# Supplementary material for: Iodide and triiodide anion complexes involving anion–π interactions with a tetrazine-based receptor
Source: Royal Society of Chemistry journal article supplement (doi:10.1039/c7dt00134g), 2017-01-01
Supplement: c7dt00134g1.pdf [file c7dt00134g1.pdf]

# Electronic Supplementary Information

## Iodide and Triiodide Anion Complexes Involving Anion- $\pi$ Interactions with a Tetrazine-based Receptor

Matteo Savastano,<sup>†</sup> Carla Bazzicalupi,<sup>†</sup> Celeste García,<sup>‡</sup> Cristina Gellini,<sup>†</sup> Maria Dolores López de la Torre,<sup>‡</sup> Palma Mariani,<sup>†</sup> Fabio Pichierri,<sup>§</sup> Antonio Bianchi,<sup>†\*</sup> Manuel Melguizo<sup>‡\*</sup>

<sup>†</sup>Department of Chemistry “Ugo Schiff”, University of Florence, Via della Lastruccia 3, 50019, Sesto Fiorentino, Italy.

<sup>‡</sup>Department of Inorganic and Organic Chemistry, University of Jaén 23071, Jaén, Spain.

<sup>§</sup>Department of Applied Chemistry, Graduate School of Engineering, Tohoku University, Sendai 980-8579, Japan.

## Table of Contents

**Figure S1.** Crystal packing of compound **1**. Water...carbon (OW1...C9) contacts with the H<sub>2</sub>L2I<sub>2</sub> molecular system developing in the (002) plane.

**Figure S2.** Superimposition of ligand and water molecules of the crystalline structures **2** and **3**.

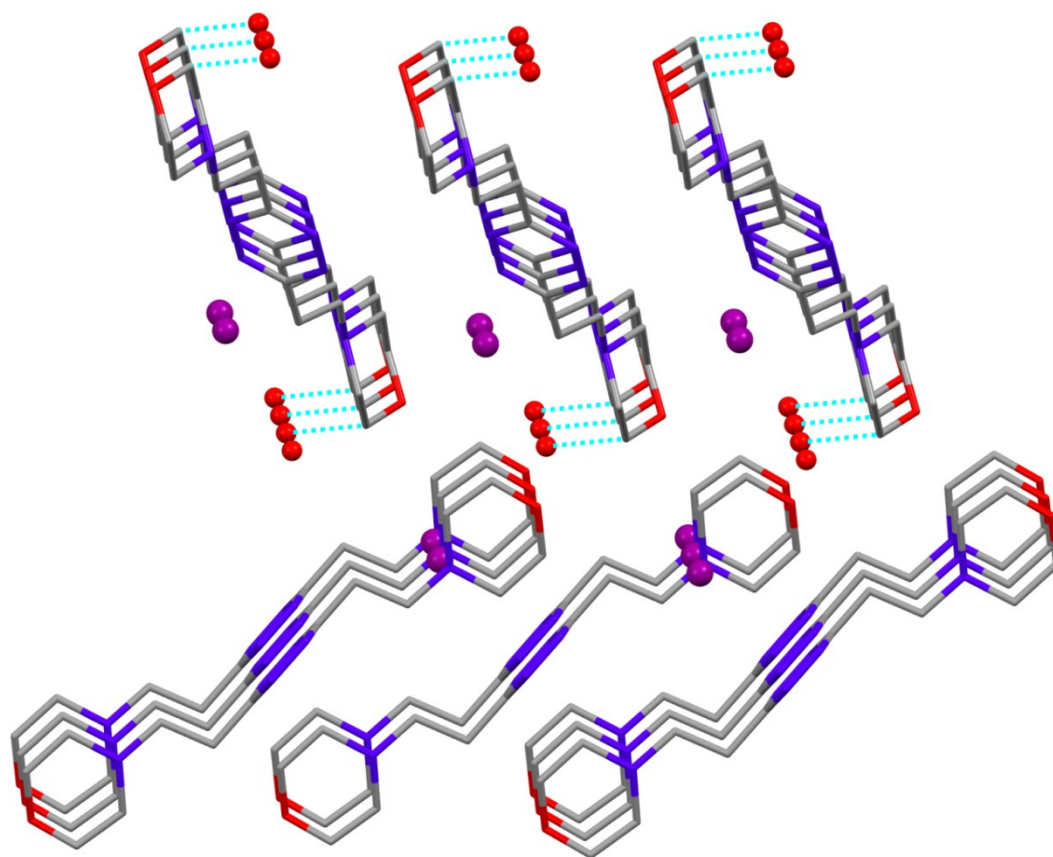

**Figure S1.** Crystal packing of compound **1**. Water...carbon (OW1...C9) contacts with the H<sub>2</sub>L2I<sub>2</sub> molecular system developing in the (002) plane.

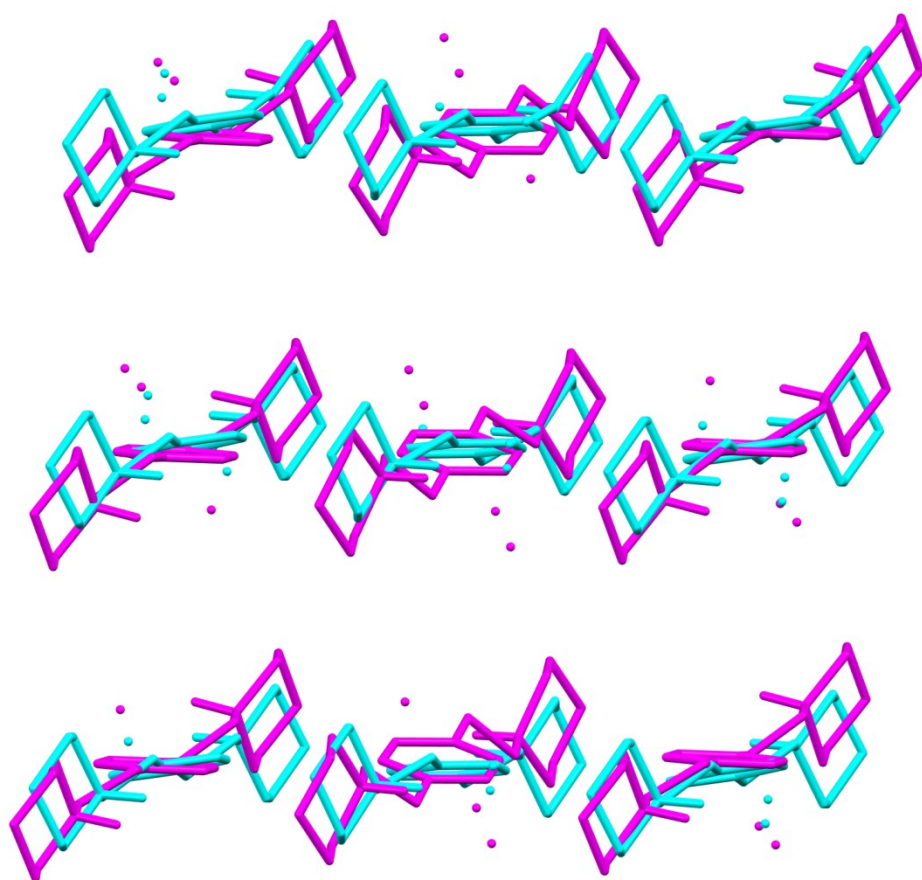

**Figure S2.** Superimposition of ligand and water molecules of the crystalline structures **2** and **3**.
